# Supplementary material for: Te4+-doped Cs2SnCl6 scintillator for flexible and efficient X-ray imaging screens
Source: Royal Society of Chemistry journal article supplement (doi:10.1039/d3tc03818a), 2024-01-01
Supplement: d3tc03818a1.pdf [file d3tc03818a1.pdf]

## Electronic Supplementary Information

### **Te<sup>4+</sup>-doped Cs<sub>2</sub>SnCl<sub>6</sub> scintillator for flexible and efficient X-ray imaging screens**

Mengyao Wang,<sup>a,b</sup> Xiaofei Qing,<sup>a</sup> Tianyun Du,<sup>a</sup> Chuanli Wu,<sup>a</sup> Xiuxun Han\*,<sup>a,b</sup>

<sup>a</sup> Institute of Optoelectronic Materials and Devices, School of Materials Science and Engineering, Jiangxi University of Science and Technology, Ganzhou 341000, China.

<sup>b</sup> Guorui Scientific Innovation Rare Earth Functional Materials (Ganzhou) Co., Ltd., Ganzhou 341000, China.

\*Corresponding author. E-mail: [xxhan@jxust.edu.cn](mailto:xxhan@jxust.edu.cn)

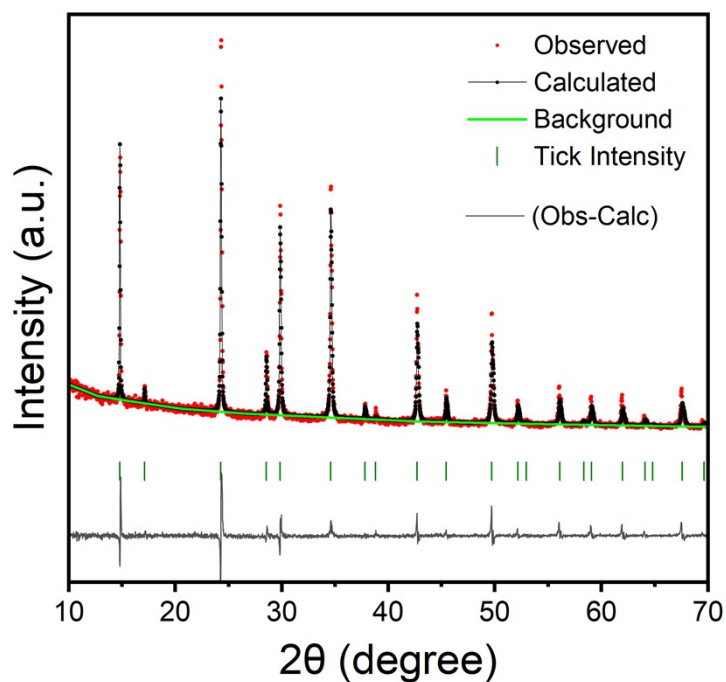

**Figure S1.** Rietveld refinement of XRD data for  $\text{Cs}_2\text{SnCl}_6:1.4\%\text{Te}$  MCs.

**Table S1** The calculated lattice parameters of  $\text{Te}^{4+}$ -doped  $\text{Cs}_2\text{SnCl}_6$  microcrystals via Rietveld refinement of XRD patterns. (a: cell lattice parameters,  $V$ : cell volume,  $R_{\text{wp}}$ : weighted profile factor,  $R_{\text{p}}$ : the reliability factor of the profile,  $\chi^2$ : goodness of fit.)

| Sample  | a (Å)   | V (Å <sup>3</sup> ) | $R_{\text{wp}}$ (%) | $R_{\text{p}}$ (%) | $\chi^2$ |
|---------|---------|---------------------|---------------------|--------------------|----------|
| Undoped | 10.3853 | 1120.101            | 10.07               | 6.83               | 5.530    |
| 0.4% Te | 10.3861 | 1120.338            | 10.02               | 6.86               | 5.750    |
| 0.9% Te | 10.3872 | 1120.725            | 9.41                | 6.64               | 4.870    |
| 1.4% Te | 10.3882 | 1121.050            | 9.53                | 6.37               | 4.680    |
| 1.9% Te | 10.3912 | 1122.010            | 9.87                | 6.88               | 5.365    |
| 2.5% Te | 10.3941 | 1122.789            | 10.12               | 6.32               | 4.862    |

**Table S2** Nominal and actual Te/(Sn+Te) co-doping concentrations in Cs<sub>2</sub>SnCl<sub>6</sub>: Te MCs. The nominal Te doping ratio was defined as the molar ratio of Te/(Sn+Te) in the precursor solution, and the actual Te/(Sn+Te) ratio was determined by ICP-MS.

| Sample | Nominal (mol%) | Actual (mol%) |
|--------|----------------|---------------|
| 1      | 0.4%           | 0.99%         |
| 2      | 0.9%           | 1.16%         |
| 3      | 1.4%           | 2.22%         |
| 4      | 1.9%           | 3.35%         |
| 5      | 2.5%           | 4.10%         |

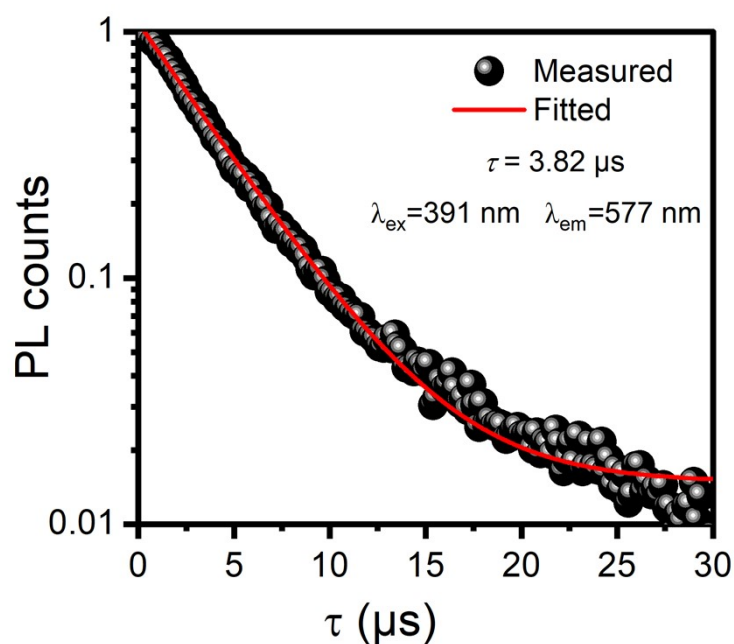

**Figure S2.** PL decay curve of Cs<sub>2</sub>SnCl<sub>6</sub>:1.4%Te MCs collected on an Edinburgh FLS980 spectrophotometer with  $\lambda_{\text{ex}} = 391 \text{ nm}$  and  $\lambda_{\text{em}} = 577 \text{ nm}$ . An average lifetime of  $3.82 \mu\text{s}$  was derived from a biexponential fitting.

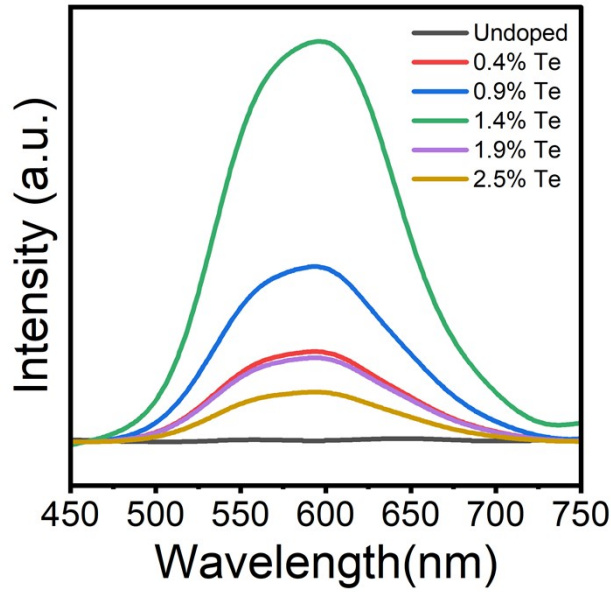

**Figure S3.** RL of  $\text{Cs}_2\text{SnCl}_6:\text{Te}$  MCs with different Te doping levels (dose rate:  $10 \mu\text{Gy}_{\text{air}}/\text{s}$ , voltage: 40 kV).

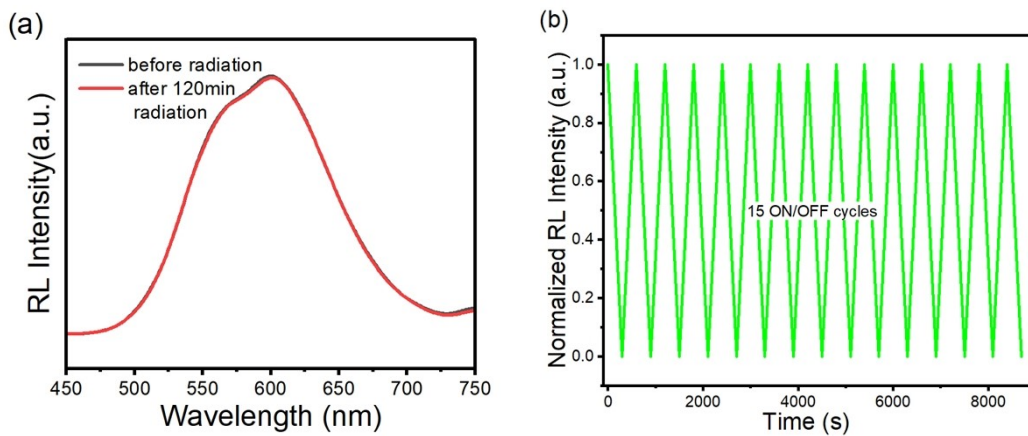

**Figure S4.** (a) RL spectra obtained from  $\text{Cs}_2\text{SnCl}_6:1.4\%\text{Te}$  MCs before and after a continuous X-ray irradiation for 120 min (dose rate:  $10 \mu\text{Gy}_{\text{air}}/\text{s}$ , voltage:40 kV). (b) luminescence intensity was also monitored within 15 consecutive X-ray on/off cycles (dose rate:  $10 \mu\text{Gy}_{\text{air}}/\text{s}$ , voltage:40 kV, exposure time: 300 s).

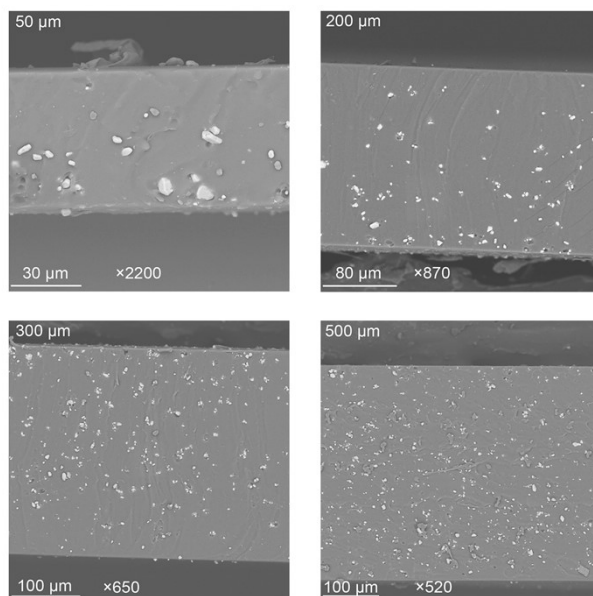

**Figure S5.** Cross-sectional SEM images of  $\text{Cs}_2\text{SnCl}_6:1.4\%\text{Te}@PDMS$  screens with different thicknesses.

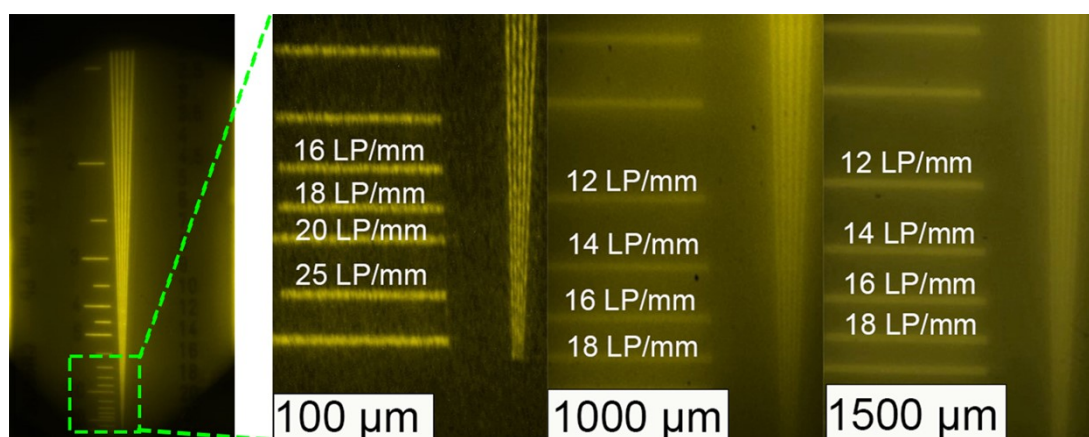

**Figure S6.** X-ray images of the standard X-ray test pattern plate using  $\text{Cs}_2\text{SnCl}_6:1.4\%\text{Te}@PDMS$  films with thicknesses of 100  $\mu\text{m}$ , 1000  $\mu\text{m}$ , and 1500  $\mu\text{m}$ .
